# Supplementary material for: An index to assess the health of Moso bamboo (Phyllostachys edulis) forest
Source: Research Square preprint supplement (doi:10.21203/rs.3.rs-394467/v1), 2021-04-13
Supplement: Supplementary file 1 [file 54e422161ed47b9e2a11bb26.xlsx]

## Sheet: Sheet1
Supplement table S5 The covariance matrix of the primary index system of Moso bamboo forest health assessment. The word “D” means the index layer. The first number in the bottom corner represents the Element layer, “1” for Stand vigor, “2” for Stand structure, “3” for Stimulus-response, “4” for economic value, and “5” for ecological function. The second number in the lower corner represents the i…
Index	D1,1	D1,2	D1,3	D1,4	D1,5	D1,6	D1,7	D1,8	D1,9	D1,10	D1,11	D1,12	D2,1	D2,2	D2,3	D2,4	D2,5	D2,6	D2,7	D2,8	D3,1	D3,2	D3,3	D3,4	D3,5	D3,6	D3,7	D3,8	D4,1	D4,2	D4,3	D4,4	D4,5	D4,6	D5,1	D5,2	D5,3	D5,4	D5,5	D5,6	D5,7	D5,8	D5,9	D5,10	D5,11	D5,12	D5,13	D5,14	D5,15
D1,1	2.68318	0.340212	2.34261	80.699	-0.0764621	-0.00138936	0.00138936	0.541962	0.426135	0.185253	0.139713	0.0110436	0.558846	0.172436	380.29	-0.000410577	0.300255	0.547605	0.227981	0.221371	0.102308	-0.00284103	0.0286623	-0.0377767	-0.0181454	0.0180118	-0.00921872	-0.405327	0.431707	-0.602486	0.472086	0.195402	0.0855612	0.0548718	20.2037	-0.287046	0.0516782	0.0300679	0.0442833	0.182444	-3.50179	-0.340403	-0.486392	-0.405327	0.0907744	0.273245	3.72103	-0.032674	3.20498
D1,2	0.340212	0.121958	0.218416	-78.4344	-0.0196348	0.000221046	-0.000221046	0.0750453	0.0719027	0.0594031	-0.102246	-0.00109747	0.0636224	0.0192596	-67.1769	-0.000139858	0.0181304	0.094927	0.00025909	-0.00834548	0.0580718	-0.00100787	0.000910913	-0.00427038	-0.00386686	0.00167936	-0.00119936	-0.0702116	-0.0742964	-0.0919546	0.0869301	-0.212841	-0.0145584	0.0223987	-0.0963652	-0.50779	-0.00312037	0.00302583	0.00602296	0.39137	-0.395437	-0.0591503	-0.0842539	-0.0702116	-0.0069159	0.0291919	0.300756	-0.00792409	-0.150283
D1,3	2.34261	0.218416	2.12368	158.7	-0.0568815	-0.00160933	0.00160933	0.468327	0.355531	0.126271	0.242105	0.0121825	0.49617	0.153189	446.598	-0.000269829	0.282565	0.452521	0.228218	0.229946	0.0431795	-0.00182603	0.0277244	-0.0335197	-0.0142343	0.016322	-0.00801405	-0.334986	0.505247	-0.51156	0.38576	0.406793	0.100873	0.0319551	20.266	0.21265	0.0547108	0.0271214	0.0382232	-0.20914	-3.10375	-0.281142	-0.401983	-0.334986	0.0990633	0.244515	3.41768	-0.0247317	3.33546
D1,4	80.699	-78.4344	158.7	593665	97.8625	-11.1703	11.1703	-444.706	-490.093	-395.203	-52.5134	1.02549	-259.177	-22.0128	426027	3.15988	27.2891	-121.384	79.4189	97.9612	305.415	-4.422	-1.39525	5.87698	5.24974	-7.92545	-4.22169	-142.562	416.341	-180.328	-289.941	-500.431	-184.798	-90.7385	11467	270.953	86.9785	-1.58285	-4.62844	-930.027	246.075	-120.236	-171.074	-142.562	-448.074	-953.344	-205.923	4.49782	-9656.37
D1,5	-0.0764621	-0.0196348	-0.0568815	97.8625	0.0530586	-0.00264542	0.00264542	-0.0867092	-0.0859096	-0.0384715	-0.206642	0.000306974	-0.15939	0.00192308	-56.2958	0.000807449	0.0200638	-0.0927019	0.0413175	0.0413792	0.160041	-0.00124882	-0.0020981	0.00364454	-0.000744538	-0.00191947	-0.000470026	-0.0284728	-0.058961	-0.100405	-0.0147949	-0.414855	0.0407549	-0.00465128	-1.42832	-0.37666	-0.00237528	0.00262954	-0.0105239	-0.0325346	0.350509	-0.0241099	-0.0341674	-0.0284728	-0.150262	-0.249861	-0.247718	0.00287154	-0.601819
D1,6	-0.00138936	0.000221046	-0.00160933	-11.1703	-0.00264542	0.00107423	-0.00107423	0.00342532	0.00304996	0.00318969	0.0271916	9.68333e-05	0.0116532	-0.000278846	-3.83887	5.54315e-05	0.00520683	0.00985104	0.000260993	-0.000102857	-0.0142769	0.000230436	0.000201215	0.000144203	0.000263218	-5.12282e-05	0.000181487	0.00680356	-0.00272155	0.00465299	0.000952676	0.0336982	-0.00332823	-0.00392436	-0.265482	0.0230108	-0.00122047	0.00057475	0.000601468	0.116779	-0.0548567	0.00574469	0.00816427	0.00680356	0.0153374	0.013969	-0.0428846	0.000230366	0.613559
D1,7	0.00138936	-0.000221046	0.00160933	11.1703	0.00264542	-0.00107423	0.00107423	-0.00342532	-0.00304996	-0.00318969	-0.0271916	-9.68333e-05	-0.0116532	0.000278846	3.83887	-5.54315e-05	-0.00520683	-0.00985104	-0.000260993	0.000102857	0.0142769	-0.000230436	-0.000201215	-0.000144203	-0.000263218	5.12282e-05	-0.000181487	-0.00680356	0.00272155	-0.00465299	-0.000952676	-0.0336982	0.00332823	0.00392436	0.265482	-0.0230108	0.00122047	-0.00057475	-0.000601468	-0.116779	0.0548567	-0.00574469	-0.00816427	-0.00680356	-0.0153374	-0.013969	0.0428846	-0.000230366	-0.613559
D1,8	0.541962	0.0750453	0.468327	-444.706	-0.0867092	0.00342532	-0.00342532	1.05299	1.09826	0.66913	0.0443372	0.0120141	0.370192	0.0985256	-428.375	0.00887912	-0.0891891	-0.0617218	-0.0166697	-0.0886606	-0.325897	0.00238205	0.0073959	-0.021769	0.00584333	0.0125121	0.00132231	0.0526506	-0.362916	-0.0869899	0.506196	0.702974	0.553989	0.162692	-10.9358	2.24769	-0.100475	-0.00349679	-0.0140071	0.366081	-0.715299	0.0448	0.0631808	0.0526506	0.409187	0.918156	2.42205	-0.0129088	5.83598
D1,9	0.426135	0.0719027	0.355531	-490.093	-0.0859096	0.00304996	-0.00304996	1.09826	1.24175	0.770457	-0.535224	0.0114194	0.323929	0.0925321	-521.656	0.00865754	-0.120186	-0.14703	-0.0430466	-0.0873887	-0.324513	0.00289974	0.00630482	-0.0209766	0.00846346	0.0124499	0.00195462	0.0831465	-0.488013	0.0319791	0.555423	0.88377	0.652771	0.192987	-18.3934	2.99672	-0.118515	-0.00731622	-0.0248947	0.290191	-0.13766	0.070331	0.0997758	0.0831465	0.474641	1.11466	2.19756	-0.0223123	6.88967
D1,10	0.185253	0.0594031	0.126271	-395.203	-0.0384715	0.00318969	-0.00318969	0.66913	0.770457	0.923915	-0.905943	-0.00685936	0.146994	0.0366987	-554.778	0.00180411	-0.336014	-0.0432168	-0.191127	-0.235114	-0.139282	-0.00544795	0.001614	-0.0130756	-0.00711628	0.00797305	0.00147179	0.0813715	-0.532593	0.0664568	0.412095	0.518463	0.572203	0.316038	-17.8116	2.06907	-0.106993	-0.0398776	-0.0139653	0.0110817	0.272009	0.0685736	0.0976458	0.0813715	0.274903	0.501986	1.17859	-0.0129783	6.31702
D1,11	0.139713	-0.102246	0.242105	-52.5134	-0.206642	0.0271916	-0.0271916	0.0443372	-0.535224	-0.905943	18.2317	-0.0180823	1.18753	0.313654	982.664	0.0188541	0.077616	1.31456	-0.209429	-0.153929	-0.782769	0.0160723	-0.00392733	-0.00581631	-0.0356897	-0.0106701	-0.00835744	0.567848	0.585765	0.745947	-0.305306	0.583603	-1.02919	-0.921359	25.4764	42.7049	0.0329117	0.0436376	0.156879	4.90613	-1.46383	0.481153	0.681418	0.567848	0.612287	1.04837	-1.88513	0.0290657	48.5863
D1,12	0.0110436	-0.00109747	0.0121825	1.02549	0.000306974	9.68333e-05	-9.68333e-05	0.0120141	0.0114194	-0.00685936	-0.0180823	0.00715667	0.00401282	-0.00108974	21.002	0.00121248	0.000730128	0.0147018	-0.000316885	-0.00212409	-0.012359	0.000558462	0.00123554	-0.000706513	0.000505128	5.48718e-06	0.000274359	0.00453654	0.0236777	0.00384455	-0.000949423	0.0781779	-0.00464117	0.00546154	0.52864	-0.220617	0.00344731	0.000236795	0.000718333	0.161305	-0.123376	0.00385436	0.00544385	0.00453654	0.0242333	-0.00506962	0.0233333	-0.000125679	0.606103
D2,1	0.558846	0.0636224	0.49617	-259.177	-0.15939	0.0116532	-0.0116532	0.370192	0.323929	0.146994	1.18753	0.00401282	1.33269	-0.00961538	254.681	-0.00649288	0.124391	0.361808	-0.0356353	0.00713013	-0.661538	-0.000333333	0.0129333	-0.0200026	0.0205256	2.5641e-06	-0.00305128	-0.0522115	0.25787	-0.0173301	-0.178311	1.36355	-0.413085	-0.0269231	2.43146	3.38182	0.00889103	-0.00512179	0.0223654	2.43376	-2.26847	-0.043	-0.0626538	-0.0522115	0.464359	0.616096	0.910256	-0.0268519	15.9755
D2,2	0.172436	0.0192596	0.153189	-22.0128	0.00192308	-0.000278846	0.000278846	0.0985256	0.0925321	0.0366987	0.313654	-0.00108974	-0.00961538	0.112179	-56.4475	0.00176571	0.0266346	-0.0508333	0.0205224	0.0172083	0.0512821	0.00166667	0.002	-0.000833333	0.00275641	0.00137179	-0.000435897	-0.0100962	-0.134337	-0.0237981	0.0813365	-0.0991474	0.0984391	-0.0448718	-3.74997	0.909872	-0.0138141	0.00496795	-0.00426282	0.330962	-0.257115	-0.00858974	-0.0121154	-0.0100962	0.0189744	0.0924679	0.0897436	-0.00088141	0.0334936
D2,3	380.29	-67.1769	446.598	426027	-56.2958	-3.83887	3.83887	-428.375	-521.656	-554.778	982.664	21.002	254.681	-56.4475	1.11094e+06	-1.4328	72.5705	175.73	-41.1047	69.531	-216.229	1.83131	5.89705	-3.35195	-0.244949	-1.28633	-1.54481	-32.3312	1104.62	164.253	-395.079	1148.74	-618.282	-175.598	29482.2	-2055.27	156.641	-3.32212	27.1049	-2006	-696.009	-26.8081	-38.7975	-32.3312	-30.6397	-317.207	239.129	8.30302	-6694.54
D2,4	-0.000410577	-0.000139858	-0.000269829	3.15988	0.000807449	5.54315e-05	-5.54315e-05	0.00887912	0.00865754	0.00180411	0.0188541	0.00121248	-0.00649288	0.00176571	-1.4328	0.00173458	-9.72019e-05	-0.00167248	-0.0010715	-0.00144109	0.00167641	4.92385e-05	0.000271919	-0.000280607	0.00103238	-0.000176305	6.85103e-05	0.00446545	-0.000408371	0.00222813	0.00455151	0.0132546	0.00856263	0.00656551	-0.171977	0.0569687	-0.00123628	0.00023057	0.000190437	0.0893461	-0.0464874	0.00375284	0.00535853	0.00446545	-0.0133228	-0.0290196	0.0317218	-1.41206e-05	0.411067
D2,5	0.300255	0.0181304	0.282565	27.2891	0.0200638	0.00520683	-0.00520683	-0.0891891	-0.120186	-0.336014	0.077616	0.000730128	0.124391	0.0266346	72.5705	-9.72019e-05	1.00634	0.0889737	0.600401	0.591644	-0.125897	0.0089859	0.00821308	-0.00248397	0.0183827	-0.000219615	0.00155974	-0.010633	0.14163	0.16522	0.0039717	0.582	-0.138321	-0.120449	3.51326	-1.5974	0.0340221	0.106174	0.0084125	1.31879	-0.415351	-0.00959615	-0.0127596	-0.010633	-0.0839282	-0.026533	-1.58192	-0.0191954	20.41
D2,6	0.547605	0.094927	0.452521	-121.384	-0.0927019	0.00985104	-0.00985104	-0.0617218	-0.14703	-0.0432168	1.31456	0.0147018	0.361808	-0.0508333	175.73	-0.00167248	0.0889737	1.61542	0.0839083	-0.110951	-0.440103	0.00109385	0.0154513	-0.0173853	-0.0200959	0.00804713	0.00144256	-0.0200968	0.159984	0.1068	-0.0879663	0.412259	-0.503492	0.160282	16.9644	0.299776	0.0699632	0.0145691	0.166386	2.4204	-2.20344	-0.0159144	-0.0241162	-0.0200968	0.575949	1.17922	-0.186923	-0.0178058	18.6197
D2,7	0.227981	0.00025909	0.228218	79.4189	0.0413175	0.000260993	-0.000260993	-0.0166697	-0.0430466	-0.191127	-0.209429	-0.000316885	-0.0356353	0.0205224	-41.1047	-0.0010715	0.600401	0.0839083	0.477071	0.404429	0.0466718	0.00629608	0.00234842	-0.000593746	0.00944078	-0.000669972	-0.00055241	-0.076475	-0.00426475	0.0640387	0.0344647	0.182137	-0.0410502	-0.0699115	2.23698	-0.989058	0.0108325	0.0680233	0.00834153	0.355695	0.162892	-0.0646043	-0.09177	-0.076475	-0.14338	-0.193264	-0.949526	-0.00611131	8.67656
D2,8	0.221371	-0.00834548	0.229946	97.9612	0.0413792	-0.000102857	0.000102857	-0.0886606	-0.0873887	-0.235114	-0.153929	-0.00212409	0.00713013	0.0172083	69.531	-0.00144109	0.591644	-0.110951	0.404429	0.46338	0.100779	0.00477921	0.00185992	0.000232264	0.00975091	-0.00138062	-0.00176103	-0.0749023	0.0883645	0.0379469	0.0110004	0.0661976	-0.0479394	-0.116688	1.42122	-0.489862	0.0149664	0.0620749	-0.0127463	-0.0692561	0.474452	-0.0634092	-0.0898828	-0.0749023	-0.124897	-0.172379	-0.767038	-0.0072086	7.90299
D3,1	0.102308	0.0580718	0.0431795	305.415	0.160041	-0.0142769	0.0142769	-0.325897	-0.324513	-0.139282	-0.782769	-0.012359	-0.661538	0.0512821	-216.229	0.00167641	-0.125897	-0.440103	0.0466718	0.100779	1.29231	-0.0114359	-0.00959487	0.0149949	-0.0110769	-0.00945641	-0.01	-0.281026	-0.275062	-0.352	0.0424872	-2.01317	0.091759	0.112821	-11.2173	-3.49738	-0.0357436	-0.00312821	-0.0478974	-1.17672	1.84523	-0.237282	-0.337231	-0.281026	-0.985128	-1.51544	0.230769	0.0109692	-12.4769
D3,2	-0.00284103	-0.00100787	-0.00182603	-4.422	-0.00124882	0.000230436	-0.000230436	0.00238205	0.00289974	-0.00544795	0.0160723	0.000558462	-0.000333333	0.00166667	1.83131	4.92385e-05	0.0089859	0.00109385	0.00629608	0.00477921	-0.0114359	0.000693333	9.48205e-05	0.000120462	-0.000103333	0.000109026	0.000184872	0.00282436	0.00115131	0.0127404	0.00206449	0.0322331	-3.6641e-05	-0.00887179	0.211146	0.0406723	0.000461795	0.00110077	-8.46154e-06	-0.0104108	0.0117754	0.00239897	0.00338923	0.00282436	0.0100846	0.0161597	-0.0207692	1.10256e-06	0.287117
D3,3	0.0286623	0.000910913	0.0277244	-1.39525	-0.0020981	0.000201215	-0.000201215	0.0073959	0.00630482	0.001614	-0.00392733	0.00123554	0.0129333	0.002	5.89705	0.000271919	0.00821308	0.0154513	0.00234842	0.00185992	-0.00959487	9.48205e-05	0.00134968	-0.000683369	0.000619359	0.000327241	2.11795e-05	-0.000683846	0.00684613	-0.00395769	0.00161064	0.0200121	-0.00070279	0.00622564	-0.0440435	-0.0274507	-0.000144821	0.000848872	0.00131523	0.149887	-0.144128	-0.000560974	-0.000820615	-0.000683846	0.0172667	0.0339845	0.0815897	-0.00136016	0.766308
D3,4	-0.0377767	-0.00427038	-0.0335197	5.87698	0.00364454	0.000144203	-0.000144203	-0.021769	-0.0209766	-0.0130756	-0.00581631	-0.000706513	-0.0200026	-0.000833333	-3.35195	-0.000280607	-0.00248397	-0.0173853	-0.000593746	0.000232264	0.0149949	0.000120462	-0.000683369	0.00160184	-6.81538e-05	-0.000510554	4.53846e-05	0.00285654	-0.00732334	0.00233024	-0.0108983	-0.0342622	-0.0019386	-0.00949231	-0.318026	0.0846575	0.000792744	1.9e-05	-0.0018431	0.0128891	0.0850579	0.00240031	0.00342785	0.00285654	-0.0104351	-0.0139523	-0.134949	0.000977259	0.0708799
D3,5	-0.0181454	-0.00386686	-0.0142343	5.24974	-0.000744538	0.000263218	-0.000263218	0.00584333	0.00846346	-0.00711628	-0.0356897	0.000505128	0.0205256	0.00275641	-0.244949	0.00103238	0.0183827	-0.0200959	0.00944078	0.00975091	-0.0110769	-0.000103333	0.000619359	-6.81538e-05	0.00549133	-0.00064641	-5.56667e-05	0.00336218	-0.00165976	-0.00898335	-0.0133685	0.0222465	-0.011551	0.00830769	-1.41553	0.0229744	-0.00417987	0.00177987	-0.00195269	0.267669	-0.147735	0.00273821	0.00403462	0.00336218	0.00796974	0.0129891	-0.0538205	-0.000538859	0.358119
D3,6	0.0180118	0.00167936	0.016322	-7.92545	-0.00191947	-5.12282e-05	5.12282e-05	0.0125121	0.0124499	0.00797305	-0.0106701	5.48718e-06	2.5641e-06	0.00137179	-1.28633	-0.000176305	-0.000219615	0.00804713	-0.000669972	-0.00138062	-0.00945641	0.000109026	0.000327241	-0.000510554	-0.00064641	0.000651477	0.000126051	0.000413974	-9.12744e-05	-0.00306504	0.00865499	0.00373545	0.00487665	0.00421026	0.175197	-0.0697396	-0.000399667	9.33077e-05	0.00087259	-0.0427576	-0.0301015	0.000356615	0.000496769	0.000413974	0.0141662	0.0430218	0.0714359	-0.000283874	-0.00220449
D3,7	-0.00921872	-0.00119936	-0.00801405	-4.22169	-0.000470026	0.000181487	-0.000181487	0.00132231	0.00195462	0.00147179	-0.00835744	0.000274359	-0.00305128	-0.000435897	-1.54481	6.85103e-05	0.00155974	0.00144256	-0.00055241	-0.00176103	-0.01	0.000184872	2.11795e-05	4.53846e-05	-5.56667e-05	0.000126051	0.000264308	0.00625513	-0.00106821	0.00614441	-0.000209359	0.0190681	-0.000249795	-0.000589744	-0.020989	-0.042629	0.000308205	0.000175385	0.000235128	-0.00128154	-0.00927205	0.00526436	0.00750615	0.00625513	0.00597923	0.00865051	-0.0168205	0.000123179	0.0996585
D3,8	-0.405327	-0.0702116	-0.334986	-142.562	-0.0284728	0.00680356	-0.00680356	0.0526506	0.0831465	0.0813715	0.567848	0.00453654	-0.0522115	-0.0100962	-32.3312	0.00446545	-0.010633	-0.0200968	-0.076475	-0.0749023	-0.281026	0.00282436	-0.000683846	0.00285654	0.00336218	0.000413974	0.00625513	0.380704	-0.0524579	0.333029	-0.0139918	0.729264	0.114401	0.096859	-4.6289	6.41738	-0.0128388	-6.76282e-05	0.00463494	0.45228	-0.296083	0.320214	0.456844	0.380704	0.403833	0.633352	-1.14423	0.00651599	0.92078
D4,1	0.431707	-0.0742964	0.505247	416.341	-0.058961	-0.00272155	0.00272155	-0.362916	-0.488013	-0.532593	0.585765	0.0236777	0.25787	-0.134337	1104.62	-0.000408371	0.14163	0.159984	-0.00426475	0.0883645	-0.275062	0.00115131	0.00684613	-0.00732334	-0.00165976	-9.12744e-05	-0.00106821	-0.0524579	1.31233	0.0480725	-0.35081	1.20426	-0.56326	-0.14926	39.1521	-4.02785	0.161734	0.00184284	0.0237156	-2.62588	-0.739704	-0.0438136	-0.0629495	-0.0524579	-0.125683	-0.555726	0.878679	0.0159126	-7.4122
D4,2	-0.602486	-0.0919546	-0.51156	-180.328	-0.100405	0.00465299	-0.00465299	-0.0869899	0.0319791	0.0664568	0.745947	0.00384455	-0.0173301	-0.0237981	164.253	0.00222813	0.16522	0.1068	0.0640387	0.0379469	-0.352	0.0127404	-0.00395769	0.00233024	-0.00898335	-0.00306504	0.00614441	0.333029	0.0480725	1.9976	-0.256023	3.67866	-0.0656293	0.0472628	-0.394777	11.7271	0.0463055	0.0210248	0.0335695	-1.73301	2.21644	0.280349	0.399635	0.333029	0.0875379	-0.0616428	-3.01919	-0.0178813	14.6173
D4,3	0.472086	0.0869301	0.38576	-289.941	-0.0147949	0.000952676	-0.000952676	0.506196	0.555423	0.412095	-0.305306	-0.000949423	-0.178311	0.0813365	-395.079	0.00455151	0.0039717	-0.0879663	0.0344647	0.0110004	0.0424872	0.00206449	0.00161064	-0.0108983	-0.0133685	0.00865499	-0.000209359	-0.0139918	-0.35081	-0.256023	0.831676	-0.242481	0.754814	-0.0550833	-5.32635	-3.21184	-0.106285	0.011929	-0.0106595	-0.912433	0.550835	-0.0115458	-0.0167902	-0.0139918	0.0667574	0.079323	1.19558	0.00209059	1.59234
D4,4	0.0855612	-0.0145584	0.100873	-184.798	0.0407549	-0.00332823	0.00332823	0.553989	0.652771	0.572203	-1.02919	-0.00464117	-0.413085	0.0984391	-618.282	0.00856263	-0.138321	-0.503492	-0.0410502	-0.0479394	0.091759	-3.6641e-05	-0.00070279	-0.0019386	-0.011551	0.00487665	-0.000249795	0.114401	-0.56326	-0.0656293	0.754814	-0.200278	1.50816	0.0449321	-7.47234	5.71189	-0.0986506	-0.00575248	-0.0429621	-0.918113	1.69639	0.0963351	0.137281	0.114401	0.0093159	-0.0211736	0.0639103	-0.00513825	9.08344
D4,5	0.195402	-0.212841	0.406793	-500.431	-0.414855	0.0336982	-0.0336982	0.702974	0.88377	0.518463	0.583603	0.0781779	1.36355	-0.0991474	1148.74	0.0132546	0.582	0.412259	0.182137	0.0661976	-2.01317	0.0322331	0.0200121	-0.0342622	0.0222465	0.00373545	0.0190681	0.729264	1.20426	3.67866	-0.242481	12.4019	-0.200278	0.172223	25.0736	13.8802	0.181705	0.039754	0.0731451	-1.25706	0.0414638	0.614732	0.875117	0.729264	0.817097	-0.145985	-3.83495	-0.0429242	49.6579
D4,6	0.0548718	0.0223987	0.0319551	-90.7385	-0.00465128	-0.00392436	0.00392436	0.162692	0.192987	0.316038	-0.921359	0.00546154	-0.0269231	-0.0448718	-175.598	0.00656551	-0.120449	0.160282	-0.0699115	-0.116688	0.112821	-0.00887179	0.00622564	-0.00949231	0.00830769	0.00421026	-0.000589744	0.096859	-0.14926	0.0472628	-0.0550833	0.172223	0.0449321	0.664103	-13.7999	2.84903	-0.0317051	-0.0158846	0.0175513	0.534692	-0.692846	0.0806667	0.116231	0.096859	0.214103	0.775526	0.74359	-0.0203449	2.31378
D5,1	20.2037	-0.0963652	20.266	11467	-1.42832	-0.265482	0.265482	-10.9358	-18.3934	-17.8116	25.4764	0.52864	2.43146	-3.74997	29482.2	-0.171977	3.51326	16.9644	2.23698	1.42122	-11.2173	0.211146	-0.0440435	-0.318026	-1.41553	0.175197	-0.020989	-4.6289	39.1521	-0.394777	-5.32635	25.0736	-7.47234	-13.7999	2605.03	-3.49941	6.72637	-0.0902299	2.35198	-118.057	-5.93899	-3.86694	-5.55468	-4.6289	-9.52454	-27.1443	35.3881	1.37044	-487.356
D5,2	-0.287046	-0.50779	0.21265	270.953	-0.37666	0.0230108	-0.0230108	2.24769	2.99672	2.06907	42.7049	-0.220617	3.38182	0.909872	-2055.27	0.0569687	-1.5974	0.299776	-0.989058	-0.489862	-3.49738	0.0406723	-0.0274507	0.0846575	0.0229744	-0.0697396	-0.042629	6.41738	-4.02785	11.7271	-3.21184	13.8802	5.71189	2.84903	-3.49941	691.108	0.262321	-0.210475	0.422503	22.8036	0.706162	5.39786	7.70086	6.41738	11.7767	26.2641	-34.9482	-0.294307	47.9957
D5,3	0.0516782	-0.00312037	0.0547108	86.9785	-0.00237528	-0.00122047	0.00122047	-0.100475	-0.118515	-0.106993	0.0329117	0.00344731	0.00889103	-0.0138141	156.641	-0.00123628	0.0340221	0.0699632	0.0108325	0.0149664	-0.0357436	0.000461795	-0.000144821	0.000792744	-0.00417987	-0.000399667	0.000308205	-0.0128388	0.161734	0.0463055	-0.106285	0.181705	-0.0986506	-0.0317051	6.72637	0.262321	0.0543071	0.000659808	0.00949981	-0.407458	0.00517782	-0.0107567	-0.0154065	-0.0128388	-0.0106282	-0.0621844	-0.283718	-0.000301519	-1.07462
D5,4	0.0300679	0.00302583	0.0271214	-1.58285	0.00262954	0.00057475	-0.00057475	-0.00349679	-0.00731622	-0.0398776	0.0436376	0.000236795	-0.00512179	0.00496795	-3.32212	0.00023057	0.106174	0.0145691	0.0680233	0.0620749	-0.00312821	0.00110077	0.000848872	1.9e-05	0.00177987	9.33077e-05	0.000175385	-6.76282e-05	0.00184284	0.0210248	0.011929	0.039754	-0.00575248	-0.0158846	-0.0902299	-0.210475	0.000659808	0.0127589	0.0016225	0.194573	-0.0323024	-0.000108462	-8.11538e-05	-6.76282e-05	-0.0108051	0.00667494	-0.19141	-0.00183199	2.4575
D5,5	0.0442833	0.00602296	0.0382232	-4.62844	-0.0105239	0.000601468	-0.000601468	-0.0140071	-0.0248947	-0.0139653	0.156879	0.000718333	0.0223654	-0.00426282	27.1049	0.000190437	0.0084125	0.166386	0.00834153	-0.0127463	-0.0478974	-8.46154e-06	0.00131523	-0.0018431	-0.00195269	0.00087259	0.000235128	0.00463494	0.0237156	0.0335695	-0.0106595	0.0731451	-0.0429621	0.0175513	2.35198	0.422503	0.00949981	0.0016225	0.0194922	0.107377	-0.201689	0.00396487	0.00556192	0.00463494	0.0422051	0.0909129	-0.0342308	-0.00113999	1.22178
D5,6	0.182444	0.39137	-0.20914	-930.027	-0.0325346	0.116779	-0.116779	0.366081	0.290191	0.0110817	4.90613	0.161305	2.43376	0.330962	-2006	0.0893461	1.31879	2.4204	0.355695	-0.0692561	-1.17672	-0.0104108	0.149887	0.0128891	0.267669	-0.0427576	-0.00128154	0.45228	-2.62588	-1.73301	-0.912433	-1.25706	-0.918113	0.534692	-118.057	22.8036	-0.407458	0.194573	0.107377	71.0802	-28.9166	0.381936	0.542736	0.45228	3.25289	6.1089	-6.89256	-0.179021	202.734
D5,7	-3.50179	-0.395437	-3.10375	246.075	0.350509	-0.0548567	0.0548567	-0.715299	-0.13766	0.272009	-1.46383	-0.123376	-2.26847	-0.257115	-696.009	-0.0464874	-0.415351	-2.20344	0.162892	0.474452	1.84523	0.0117754	-0.144128	0.0850579	-0.147735	-0.0301015	-0.00927205	-0.296083	-0.739704	2.21644	0.550835	0.0414638	1.69639	-0.692846	-5.93899	0.706162	0.00517782	-0.0323024	-0.201689	-28.9166	30.8876	-0.250693	-0.355299	-0.296083	-2.84039	-4.44983	-9.94667	0.0369312	20.2362
D5,8	-0.340403	-0.0591503	-0.281142	-120.236	-0.0241099	0.00574469	-0.00574469	0.0448	0.070331	0.0685736	0.481153	0.00385436	-0.043	-0.00858974	-26.8081	0.00375284	-0.00959615	-0.0159144	-0.0646043	-0.0634092	-0.237282	0.00239897	-0.000560974	0.00240031	0.00273821	0.000356615	0.00526436	0.320214	-0.0438136	0.280349	-0.0115458	0.614732	0.0963351	0.0806667	-3.86694	5.39786	-0.0107567	-0.000108462	0.00396487	0.381936	-0.250693	0.269345	0.384257	0.320214	0.340387	0.533204	-0.960513	0.00549685	0.785537
D5,9	-0.486392	-0.0842539	-0.401983	-171.074	-0.0341674	0.00816427	-0.00816427	0.0631808	0.0997758	0.0976458	0.681418	0.00544385	-0.0626538	-0.0121154	-38.7975	0.00535853	-0.0127596	-0.0241162	-0.09177	-0.0898828	-0.337231	0.00338923	-0.000820615	0.00342785	0.00403462	0.000496769	0.00750615	0.456844	-0.0629495	0.399635	-0.0167902	0.875117	0.137281	0.116231	-5.55468	7.70086	-0.0154065	-8.11538e-05	0.00556192	0.542736	-0.355299	0.384257	0.548213	0.456844	0.4846	0.760023	-1.37308	0.00781919	1.10494
D5,10	-0.405327	-0.0702116	-0.334986	-142.562	-0.0284728	0.00680356	-0.00680356	0.0526506	0.0831465	0.0813715	0.567848	0.00453654	-0.0522115	-0.0100962	-32.3312	0.00446545	-0.010633	-0.0200968	-0.076475	-0.0749023	-0.281026	0.00282436	-0.000683846	0.00285654	0.00336218	0.000413974	0.00625513	0.380704	-0.0524579	0.333029	-0.0139918	0.729264	0.114401	0.096859	-4.6289	6.41738	-0.0128388	-6.76282e-05	0.00463494	0.45228	-0.296083	0.320214	0.456844	0.380704	0.403833	0.633352	-1.14423	0.00651599	0.92078
D5,11	0.0907744	-0.0069159	0.0990633	-448.074	-0.150262	0.0153374	-0.0153374	0.409187	0.474641	0.274903	0.612287	0.0242333	0.464359	0.0189744	-30.6397	-0.0133228	-0.0839282	0.575949	-0.14338	-0.124897	-0.985128	0.0100846	0.0172667	-0.0104351	0.00796974	0.0141662	0.00597923	0.403833	-0.125683	0.0875379	0.0667574	0.817097	0.0093159	0.214103	-9.52454	11.7767	-0.0106282	-0.0108051	0.0422051	3.25289	-2.84039	0.340387	0.4846	0.403833	2.40773	4.37994	-0.368205	-0.020149	0.365879
D5,12	0.273245	0.0291919	0.244515	-953.344	-0.249861	0.013969	-0.013969	0.918156	1.11466	0.501986	1.04837	-0.00506962	0.616096	0.0924679	-317.207	-0.0290196	-0.026533	1.17922	-0.193264	-0.172379	-1.51544	0.0161597	0.0339845	-0.0139523	0.0129891	0.0430218	0.00865051	0.633352	-0.555726	-0.0616428	0.079323	-0.145985	-0.0211736	0.775526	-27.1443	26.2641	-0.0621844	0.00667494	0.0909129	6.1089	-4.44983	0.533204	0.760023	0.633352	4.37994	10.7146	0.761667	-0.0671859	18.5303
D5,13	3.72103	0.300756	3.41768	-205.923	-0.247718	-0.0428846	0.0428846	2.42205	2.19756	1.17859	-1.88513	0.0233333	0.910256	0.0897436	239.129	0.0317218	-1.58192	-0.186923	-0.949526	-0.767038	0.230769	-0.0207692	0.0815897	-0.134949	-0.0538205	0.0714359	-0.0168205	-1.14423	0.878679	-3.01919	1.19558	-3.83495	0.0639103	0.74359	35.3881	-34.9482	-0.283718	-0.19141	-0.0342308	-6.89256	-9.94667	-0.960513	-1.37308	-1.14423	-0.368205	0.761667	32.6667	-0.0383462	-90.4919
D5,14	-0.032674	-0.00792409	-0.0247317	4.49782	0.00287154	0.000230366	-0.000230366	-0.0129088	-0.0223123	-0.0129783	0.0290657	-0.000125679	-0.0268519	-0.00088141	8.30302	-1.41206e-05	-0.0191954	-0.0178058	-0.00611131	-0.0072086	0.0109692	1.10256e-06	-0.00136016	0.000977259	-0.000538859	-0.000283874	0.000123179	0.00651599	0.0159126	-0.0178813	0.00209059	-0.0429242	-0.00513825	-0.0203449	1.37044	-0.294307	-0.000301519	-0.00183199	-0.00113999	-0.179021	0.0369312	0.00549685	0.00781919	0.00651599	-0.020149	-0.0671859	-0.0383462	0.00643641	-2.53644
D5,15	3.20498	-0.150283	3.33546	-9656.37	-0.601819	0.613559	-0.613559	5.83598	6.88967	6.31702	48.5863	0.606103	15.9755	0.0334936	-6694.54	0.411067	20.41	18.6197	8.67656	7.90299	-12.4769	0.287117	0.766308	0.0708799	0.358119	-0.00220449	0.0996585	0.92078	-7.4122	14.6173	1.59234	49.6579	9.08344	2.31378	-487.356	47.9957	-1.07462	2.4575	1.22178	202.734	20.2362	0.785537	1.10494	0.92078	0.365879	18.5303	-90.4919	-2.53644	3536.32
D5,16	-0.0614479	-0.0216892	-0.0397242	27.7825	0.00870364	0.000248426	-0.000248426	-0.0294572	-0.0526551	-0.0420143	0.122227	-0.000225026	-0.0393436	-0.00435897	27.6912	0.00106378	-0.0139908	-0.0191434	0.00398755	-0.00194064	0.0113385	0.000306462	-0.00233612	0.00160606	-0.00194285	-0.000744574	0.000387462	0.00802872	0.0480738	-0.0244413	-0.0121734	-0.0459101	-0.0233667	-0.0505333	3.63839	-0.528481	0.00556995	-0.00110426	-0.000161385	-0.354394	0.0861777	0.00686021	0.00963446	0.00802872	-0.0839974	-0.206313	-0.0245641	0.0104812	-3.52428
D5,17	-0.0024841	-0.000704756	-0.00184388	14.9948	0.00511926	-0.000427038	0.000427038	-0.0154608	-0.0140824	-0.00618115	-0.0995931	-0.000351282	-0.0234231	0.0020641	-7.06617	0.00010716	-0.00738244	-0.0124559	0.00380683	0.00466483	0.0478718	-0.000304615	1.2e-05	0.00067259	0.000514667	-0.000378513	-0.000469872	-0.0247635	-0.012845	-0.00516212	-0.00717768	-0.0512527	-0.00399845	0.00774359	-1.09234	-0.606261	-0.00185449	-0.000320641	-0.00146731	-0.037219	0.0793582	-0.0208623	-0.0297162	-0.0247635	-0.0336808	-0.0608555	0.0286923	-0.00101647	0.35346
D5,18	0.768503	0.138559	0.63086	-128.769	-0.0651752	-0.000503801	0.000503801	0.0991971	0.046169	0.0672135	-0.454217	0.00390449	0.19184	0.0196731	135.417	-0.011241	0.105648	0.491091	0.0037538	-0.035696	-0.178205	-0.00411256	0.0144517	-0.0126784	-0.00562495	0.0133227	0.00126659	0.00658558	0.122071	-0.183998	0.0727309	0.0441081	-0.110913	0.207013	3.17624	-2.49033	0.0315558	0.0167608	0.0510042	0.94754	-2.09864	0.00564282	0.00790269	0.00658558	0.554544	1.40039	0.41659	-0.0132181	-1.55771
D5,19	9.79224	-1.0529	10.8394	1044.28	-2.32227	-0.0737521	0.0737521	3.61533	2.64089	0.961458	-7.85939	-0.461796	10.3258	-0.888212	6847.26	-0.282148	0.52767	4.8799	2.04694	0.718183	-10.0057	0.00717215	0.0106012	-0.259231	-0.132348	0.0718188	-0.069385	-2.95248	8.74281	5.54734	1.50187	35.2865	3.4343	-2.60018	580.22	70.8376	2.13749	-0.227125	0.87605	-60.5169	7.26596	-2.473	-3.54298	-2.95248	1.07163	0.0645103	11.1868	0.0511391	-109.521
D5,20	-0.0103182	-0.00317922	-0.00715222	21.1626	0.00200017	-0.000143617	0.000143617	-0.0257594	-0.0273265	-0.0233732	-0.0210414	-0.00106428	0.000998718	-0.000967949	15.0033	9.72835e-05	0.0238072	-0.0147174	0.0153841	0.0182062	0.0185231	-0.000177333	-0.000379492	0.000796046	0.00185946	-0.000997021	-0.000437692	-0.00405955	0.0176377	-0.00435756	-0.0128072	-0.00738232	-0.000765453	0.00374103	0.158254	0.242605	0.00333445	0.00156796	-0.000753731	-0.0813917	0.0780702	-0.00349626	-0.00487146	-0.00405955	-0.0208179	-0.0531081	-0.114538	-1.12167e-05	0.031051
D5,21	12.995	-2.88708	15.8615	1116.79	-4.26489	-0.0959539	0.0959539	4.82551	4.98172	1.38994	-20.4079	-1.10269	17.1986	-2.0691	11386.5	-0.602531	2.07082	7.86248	4.78054	2.88189	-15.7981	0.0447805	-0.0640213	-0.380139	-0.193291	0.101273	-0.108332	-2.36675	14.21	15.7842	1.98042	70.2141	5.86192	-2.74246	833.448	192.294	3.54518	-0.232443	1.54787	-137.441	33.0036	-1.97964	-2.8401	-2.36675	3.59556	6.04605	2.47513	-0.0504912	-206.077
D5,22	5.62514	-1.05169	6.66736	4387.33	0.388871	-0.134573	0.134573	-2.62165	-1.88813	-4.0361	-14.8959	-0.032326	1.75328	0.403494	6410.11	-0.00659944	7.94196	-2.52706	5.12963	6.48139	-1.36415	0.0490418	0.0229914	-0.116452	0.240253	0.0347879	-0.0274051	-1.39994	5.04724	6.08411	-2.39308	19.3307	-1.72994	1.7286	48.7392	35.3606	0.903039	0.619236	-0.0426025	-44.979	13.5098	-1.19149	-1.67993	-1.39994	-1.75755	-1.61796	-12.2588	-0.329509	43.1423
D5,23	1.58527	-0.481786	2.0603	2422.06	-0.183742	-0.051734	0.051734	-1.60389	-1.96148	-2.42778	-4.14678	-0.0281217	0.940212	-0.206058	5042.33	0.0102593	1.77382	-1.56445	0.811461	1.53357	-1.23477	0.0146485	-0.0178501	-0.0495181	0.0746745	0.000827872	-0.0118028	-0.556296	5.20101	0.429455	-1.6104	6.54469	-2.16185	0.151192	143.504	-34.9642	0.760199	0.0106184	-0.0665113	-30.2558	2.36418	-0.471041	-0.667555	-0.556296	-0.88439	-2.79817	5.81346	0.0386075	-122.91
D5,24	5.48828	-0.303597	5.79198	1323.32	-0.922002	-0.00804069	0.00804069	1.6811	1.1857	-1.33397	8.63497	0.280855	4.29637	-0.277083	7407.08	0.0368337	0.454133	1.66266	-0.334958	0.179222	-4.02144	0.0323305	0.0921984	-0.153227	0.00764372	0.0518884	0.00181308	0.206345	7.99107	1.423	-0.876074	14.9348	-2.5961	-0.6365	213.522	-5.26572	0.858535	-0.0247765	0.207676	-14.9423	-8.90327	0.180244	0.247614	0.206345	1.60946	1.05512	14.1486	-0.0107925	-8.62293
D5,25	2.33481	1.10148	1.23676	-3017.01	-0.508655	0.0837939	-0.0837939	1.98304	1.81017	2.70165	5.27512	-0.136007	1.24109	0.590003	-2949.69	0.00650476	-1.47647	-0.665943	-1.34122	-0.866537	-0.305149	-0.0303244	0.018186	-0.0585847	0.0323494	0.034119	-0.0195882	-0.0117298	-2.94899	-2.95347	3.39357	-5.88963	2.23707	-0.302488	-97.0728	-1.16156	-1.10785	-0.0958381	-0.0973562	19.5201	-11.4049	-0.00919838	-0.0140757	-0.0117298	1.56553	0.769108	8.30722	0.0944024	-26.4164
D5,26	1.71921	0.094076	1.62879	849.849	0.187762	-0.0390325	0.0390325	0.0964128	-0.149785	-0.32498	1.59295	0.112801	0.30921	0.350821	137.14	0.0246097	0.287603	-0.0267975	0.429337	0.373347	1.22139	0.00702882	0.0548464	-0.0334285	0.0430839	-0.0118855	-0.022992	-1.0356	0.210498	-0.243868	-0.289522	-0.715999	0.0943252	-0.373682	4.88595	-9.69256	0.0670625	0.0592166	-0.0351961	6.5647	-3.18408	-0.870969	-1.24272	-1.0356	-0.760889	-1.91077	3.85056	-0.0458799	34.7718
Supplement table S6 The covariance matrix of the final elected index system of Moso bamboo forest health assessment. The word “D” means the index layer. The first number in the bottom corner represents the Element layer, “1” for Stand vigor, “2” for Stand structure, “3” for Stimulus-response, “4” for economic value, and “5” for ecological function. The second number in the lower corner represents…
Index	D11	D12	D13	D14	D21	D22	D23	D24	D31	D32	D33	D41	D42	D43	D51	D52	D53	D54	D55
D11	2.01	-0.05	0.41	0.11	0	0.41	392.21	0.32	0.17	0.03	-0.01	0.43	-0.39	0.1	11.43	-0.24	0.59	13.8	5.1
D12	-0.05	0.05	-0.08	-0.2	0	-0.16	-53.46	0.02	0.16	0	0	-0.05	-0.11	-0.01	-0.85	-0.04	-0.06	-4.22	-0.89
D13	0.41	-0.08	1.05	-0.01	0.01	0.34	-466.99	-0.08	-0.29	0.01	0.01	-0.41	-0.03	0.2	-15.1	0.1	0.08	3.93	1.38
D14	0.11	-0.2	-0.01	18.6	0.02	1.14	955.2	0.1	-0.71	-0.01	-0.04	0.53	0.87	-0.89	18.59	0.67	-0.51	-22.94	8.18
D21	0	0	0.01	0.02	0	-0.01	-1.91	0	0	0	0	0	0	0.01	-0.24	0.01	-0.01	-0.64	0.03
D22	0.41	-0.16	0.34	1.14	-0.01	1.31	222.13	0.15	-0.61	0.01	0.02	0.21	0.06	0.01	-3.07	0.01	0.16	16.18	3.91
D23	392.21	-53.46	-466.99	955.2	-1.91	222.13	1114000	86.02	-174.02	5.08	0.56	1096.44	221.89	-152.28	26540.4	7.04	117.17	10702	7266.58
D24	0.32	0.02	-0.08	0.1	0	0.15	86.02	1.03	-0.15	0.01	0.02	0.16	0.15	-0.14	5.24	-0.03	0.12	2.56	0.61
D31	0.17	0.16	-0.29	-0.71	0	-0.61	-174.02	-0.15	1.24	-0.01	-0.01	-0.21	-0.46	0.07	-4.73	-0.36	-0.14	-14.42	-3.52
D32	0.03	0	0.01	-0.01	0	0.01	5.08	0.01	-0.01	0	0	0.01	0	0.01	-0.18	0	0.01	-0.1	0.08
D33	-0.01	0	0.01	-0.04	0	0.02	0.56	0.02	-0.01	0	0.01	0	-0.01	0.01	-1.34	0	-0.01	-0.17	0.02
D41	0.43	-0.05	-0.41	0.53	0	0.21	1096.44	0.16	-0.21	0.01	0	1.29	0.13	-0.11	34.91	0	0.09	13.19	7.73
D42	-0.39	-0.11	-0.03	0.87	0	0.06	221.89	0.15	-0.46	0	-0.01	0.13	1.94	-0.01	7.15	0.26	-0.15	18.2	2.14
D43	0.1	-0.01	0.2	-0.89	0.01	0.01	-152.28	-0.14	0.07	0.01	0.01	-0.11	-0.01	0.65	-10.2	0.06	0.24	-1.77	-0.3
D51	11.43	-0.85	-15.1	18.59	-0.24	-3.07	26540.4	5.24	-4.73	-0.18	-1.34	34.91	7.15	-10.2	2146.9	0.95	0.17	715.96	171.62
D52	-0.24	-0.04	0.1	0.67	0.01	0.01	7.04	-0.03	-0.36	0	0	0	0.26	0.06	0.95	0.33	0.04	-0.92	0.73
D53	0.59	-0.06	0.08	-0.51	-0.01	0.16	117.17	0.12	-0.14	0.01	-0.01	0.09	-0.15	0.24	0.17	0.04	1.06	-2.82	1.29
D54	13.8	-4.22	3.93	-22.94	-0.64	16.18	10702	2.56	-14.42	-0.1	-0.17	13.19	18.2	-1.77	715.96	-0.92	-2.82	2225.66	109.35
D55	5.1	-0.89	1.38	8.18	0.03	3.91	7266.58	0.61	-3.52	0.08	0.02	7.73	2.14	-0.3	171.62	0.73	1.29	109.35	72.81
[truncated: 11 more columns]
